# Supplementary material for: Core Transcription Factors, MicroRNAs, and Small Molecules Drive Transdifferentiation of Human Fibroblasts Towards The Cardiac Cell Lineage
Source: PubMed Central journal article supplement (PMC5223186; doi:10.1038/srep40285), 2017-01-10
Supplement: srep40285-s3.pdf [file srep40285-s3.pdf]

## **Supplementary Information**

### **TITLE**

Core Transcription Factors, MicroRNAs, And Small Molecules Drive Transdifferentiation Of Human Fibroblasts Towards The Cardiac Cell Lineage

### **AUTHORS & AFFILIATIONS**

Nicolas Christoforou<sup>1,2,#</sup>, Syandan Chakraborty<sup>3,#</sup>, Robert D. Kirkton<sup>1</sup>, Andrew F. Adler<sup>4</sup>, Russell C. Addis<sup>5</sup>, Kam W. Leong<sup>3</sup>.

<sup>1</sup>Department of Biomedical Engineering, Duke University, Durham, NC, USA

<sup>2</sup>Department of Biomedical Engineering, Khalifa University, Abu Dhabi, UAE

<sup>3</sup>Department of Biomedical Engineering, Columbia University, New York, NY, USA

<sup>4</sup>Department of Neurosciences, University of California - San Diego, La Jolla, CA, USA

<sup>5</sup>Phelix Therapeutics, Philadelphia, PA, USA

#These authors have equally contributed to this work

### **CORRESPONDING AUTHORS**

Kam W. Leong, Department of Biomedical Engineering, Columbia University, Mail Code 8904, 1210 Amsterdam Avenue, New York, NY, 10027, USA, Phone: +1.212.854.8725, Email: kwl2121@columbia.edu

Nicolas Christoforou, Department of Biomedical Engineering, Khalifa University, P. O. Box 127788, Abu Dhabi, UAE, Phone: +973.2.501.8560, Email: nicolas.christoforou@kustar.ac.ae, and Department of Biomedical Engineering, Duke University, 136 Hudson Hall, Box 90281, Durham, NC, 27708, USA, Email: nc28@duke.edu

**Contents:**

- 1) Supplementary Figure Legends**
- 2) Supplementary Table Legends**
- 3) Supplementary Movie Legends**
- 4) Supplementary Figures**
- 5) Supplementary Table 2**

### **Supplementary Figure Legends:**

**Supplementary Figure 1. Immunofluorescence of control cells.** Cells were cultured in the same conditions and for the same amount of time used to derive iCM. (A-F) Negative Control (M2rtTA only), (G-L) Cells transfected only with microRNAs.

**Supplementary Figure 2. Immunofluorescence of rat neonatal cardiomyocytes.** Cells were cultured in the same conditions and for the same amount of time used to derive iCM. Immunofluorescence for: (A) ACTN2, (B) TNNT2, (C) TNNT2 and GJA1, (D) ACTN2 and SERCA2, (E) RYR2 and TNNT2, (F) TAGLN, (G) ACTA2, (H) MYH11.

**Supplementary Figure 3. Gene expression analysis.** Relative gene expression analysis performed using RT-PCR on RNA isolated from cells being transdifferentiated for 14 days. Samples: (i) Negative Control, (ii) microRNA only, (iii) cardiac TF only, (iv) microRNA and cardiac TF. \$ denotes significance compared to group i, # denotes significance compared to group ii, % denotes significance compared to group iii (T-Test: \$ or # or % < 0.05).

**Supplementary Figure 4. Microarray gene expression analysis.** Pathway analysis for genes that were determined to be significantly upregulated or downregulated when comparing iCM (cardiac TF and microRNA) to negative control HDF. Determined using the WEB-based GENE SeT AnaLysis Toolkit (WebGestalt). The "Gene #" column refers to the number of identified genes that belong to a particular pathway and the "P-value" column refers to the P-value of each of the pathways and based on the number of identified genes. C: reference gene number in category, O: number of genes in gene set and category, E: expected number in category, R: enrichment ratio.

**Supplementary Figure 5. Microarray gene expression analysis.** Comparison of cells transduced with cardiac TF / microRNA and cells transduced only with cardiac TF. (A) Significantly upregulated, and (B) Significantly downregulated genes in iCM (cardiac TF and microRNA) and

compared to cells transduced only with cardiac TF. (C) Pathway analysis for genes that were determined to be significantly upregulated or downregulated when comparing iCM (cardiac TF and microRNA) to cells transduced only with cardiac TF. Determined using the WEB-based GENE SeT AnaLysis Toolkit (WebGestalt). The “Gene #” column refers to the number of identified genes that belong to a particular pathway and the “P-value” column refers to the P-value of each of the pathways and based on the number of identified genes. C: reference gene number in category, O: number of genes in gene set and category, E: expected number in category, R: enrichment ratio.

**Supplementary Figure 6. Effect of small molecule inhibitors or protein ligands on the transdifferentiation efficiency of HDF transduced with 5 cardiac TF only.** (A-F) Small molecule inhibitor effect and (G-L) protein ligand effect. (A or G) Number of nuclei, (B or H) Number of ACTN2<sup>+</sup> cells, and (C or I) Number of TNNT2<sup>+</sup> cells (per mm<sup>2</sup>). (D or J) Number of Ki67<sup>+</sup> nuclei normalized to the total number of nuclei. (E or K) Number of ACTN2<sup>+</sup> cells normalized to the total number of nuclei. (F or L) Number of TNNT2<sup>+</sup> cells normalized to the total number of nuclei. Experiment performed in triplicate. Error bar represents calculated standard deviation. Significant difference between two values was calculated using t-test (two-tailed distribution, two sample unequal variance).

#### **Supplementary Table Legends:**

**Supplementary Table 1.** List of genes that are significantly upregulated or downregulated when comparing transdifferentiated iCM (5 cardiac TF and microRNA) to negative control HDF. Also included is the fold change for the comparison between cells transduced with 5 cardiac TFs and the negative control HDF.

**Supplementary Table 2.** Primers used for gene expression analysis.

### **Supplementary Movie Legends:**

**Supplementary Movie 1.** Transdifferentiated iCM transduced with a vector allowing the expression of a genetically encoded calcium indicator (GCaMP3) under the control of the TNNT2 promoter element. Cells are not being stimulated and are just passively being monitored using fluorescence microscopy. The video is presented at 10x acceleration.

**Supplementary Movie 2.** Transdifferentiated iCM transduced with a vector allowing the expression of a genetically encoded calcium indicator (GCaMP3) under the control of the TNNT2 promoter element. Cells are being stimulated with epinephrine at specific time-points (120 sec: Tyrode's, 180 sec: Epinephrine, 240 sec: Tyrode's, 280 sec: Epinephrine). The video is presented at 10x acceleration.

**Supplementary Figures:**

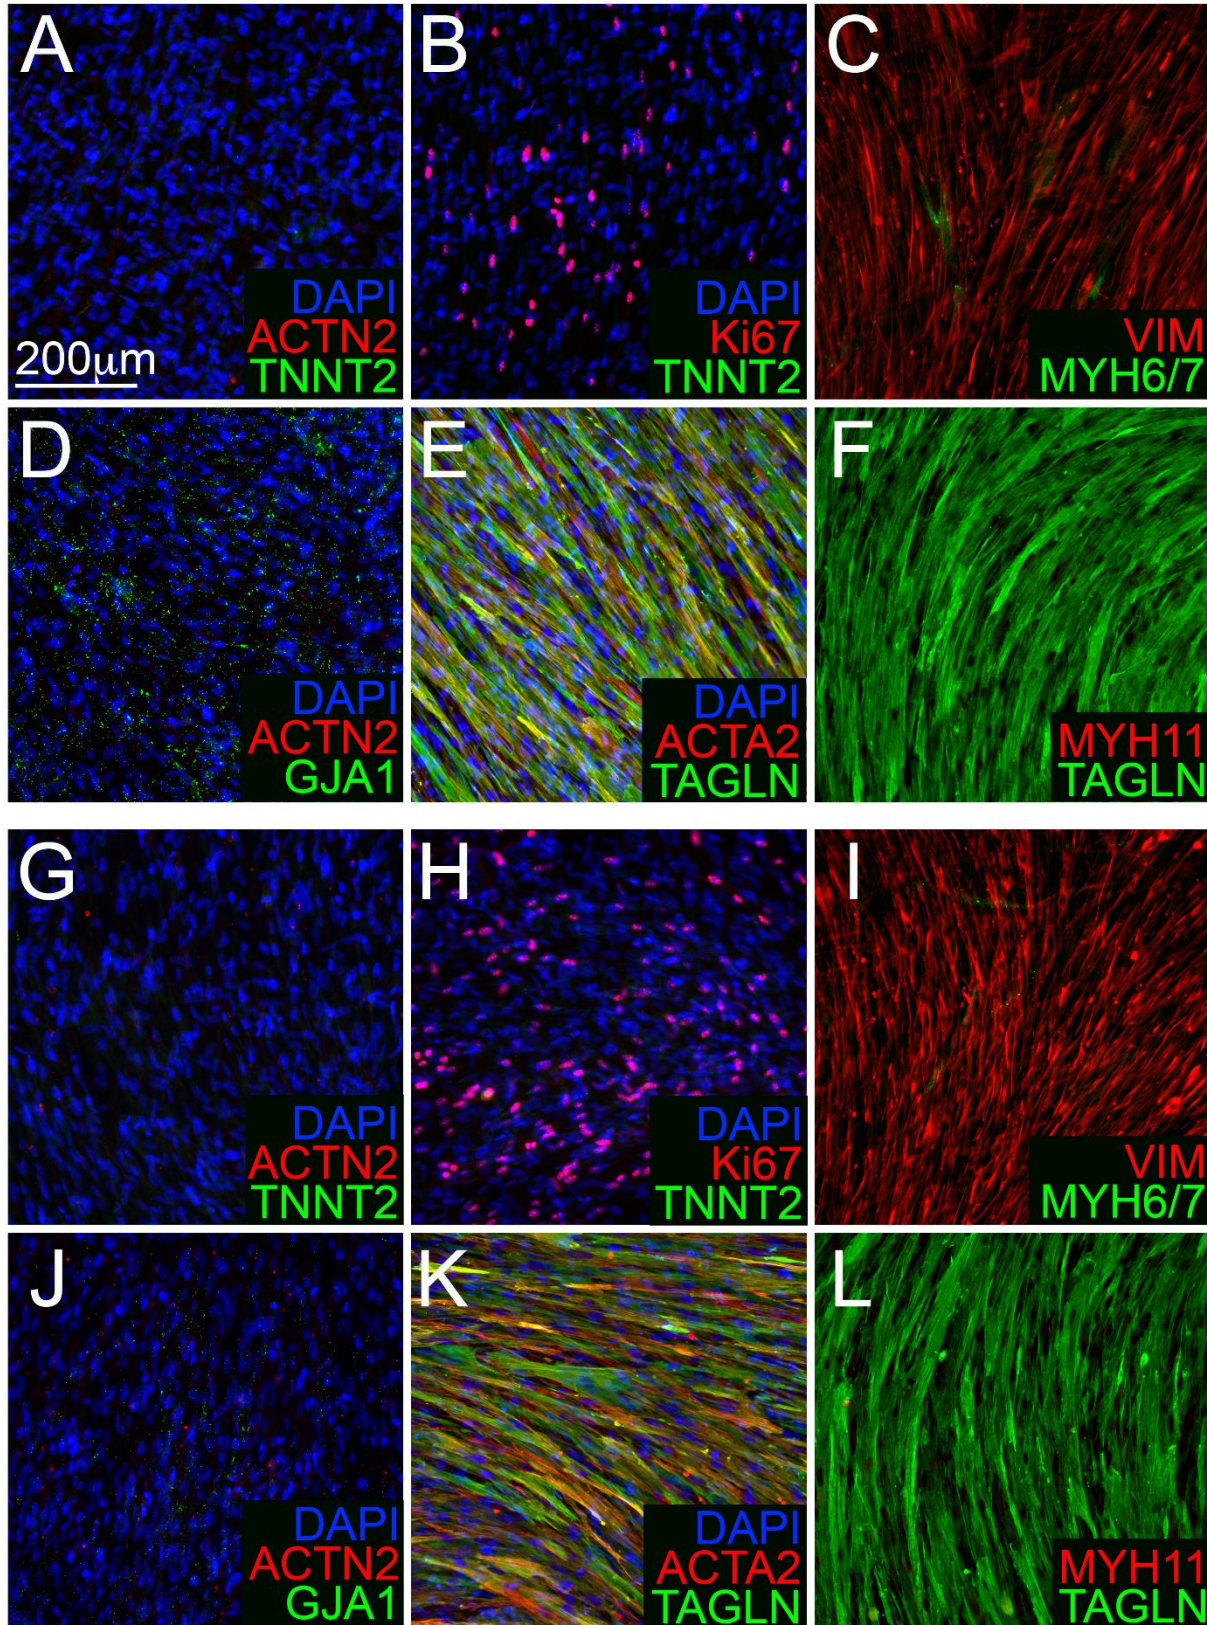

Supplementary Figure 1. Immunofluorescence of control cells.

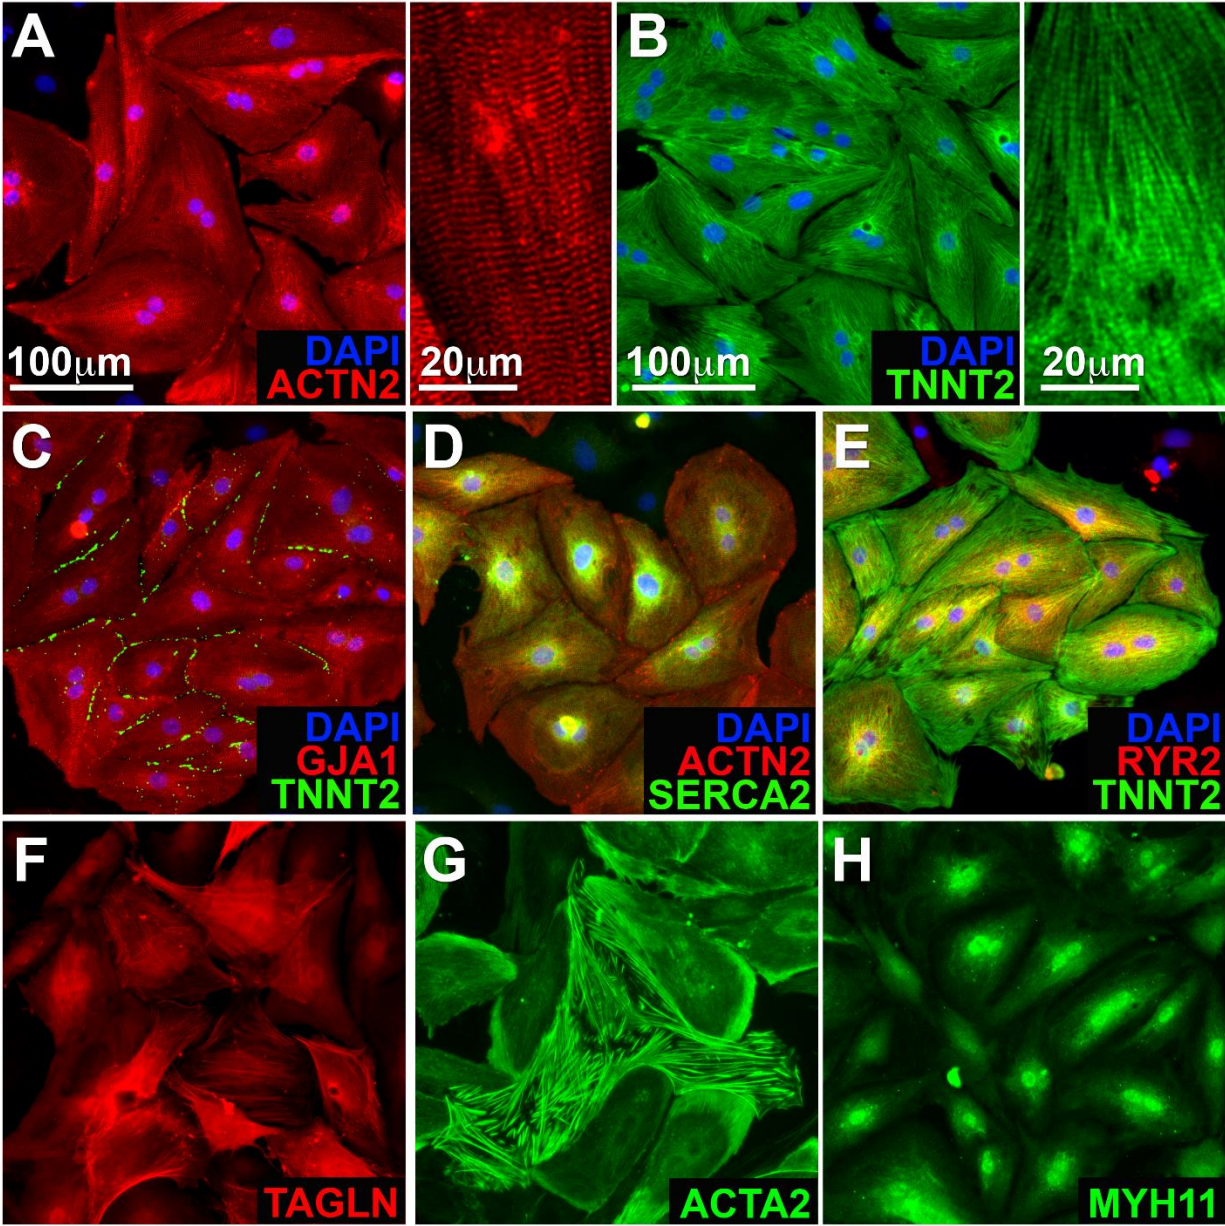

Supplementary Figure 2. Immunofluorescence of rat neonatal cardiomyocytes.



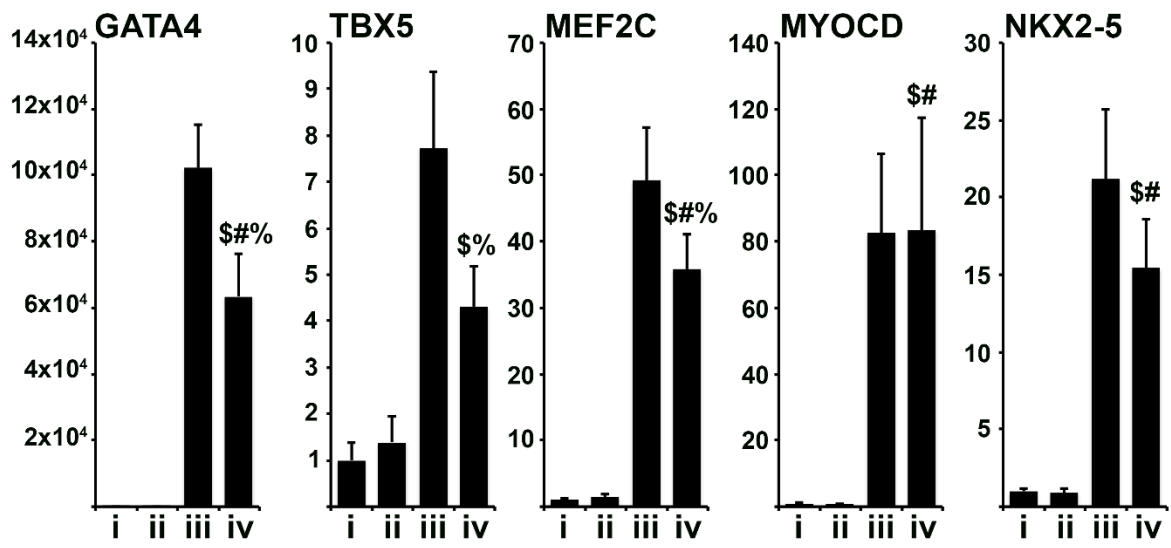

Supplementary Figure 3. Gene expression analysis.

| Pathway Commons Analysis: GTMMN+microRNA Versus Negative Control (Upregulated Genes)  |                                                                                                                                                    |     |    |       |      |          |
|---------------------------------------------------------------------------------------|----------------------------------------------------------------------------------------------------------------------------------------------------|-----|----|-------|------|----------|
| Pathway Description                                                                   | Entrez Gene                                                                                                                                        | C   | O  | E     | R    | P-Value  |
| Muscle contraction                                                                    | 7134 10398 7137 10580 7169 1674 25802 88 72 4629 7111 4635 800 4638 462159 7139 4624 7168 7414                                                     | 45  | 30 | 3.37  | 5.93 | 1.33E-11 |
| Smooth Muscle Contraction                                                             | 10398 10580 7169 25802 72 4629 800 4638 59 7168 7414                                                                                               | 19  | 11 | 1.42  | 7.73 | 1.70E-08 |
| Cell junction organization                                                            | 1002 2318 3728 3655 50848 23705 1006 84612 3909 999 9 459 1012 5584 36881001 1000 51208 56288                                                      | 60  | 18 | 4.49  | 4.00 | 2.13E-07 |
| Cell-cell junction organization                                                       | 1002 3728 50848 23705 1006 84612 999 1012 5584 1001 5 1208 1000 56288                                                                              | 37  | 13 | 2.77  | 4.69 | 1.41E-06 |
| Striated Muscle Contraction                                                           | 7134 7137 7169 1674 88 7111 4635 4621 7139 4624 7168                                                                                               | 30  | 11 | 2.25  | 4.89 | 5.70E-06 |
| Endosomal/Vacuolar pathway                                                            | 3133 3134 3105 3106 3135 3107                                                                                                                      | 9   | 6  | 0.67  | 8.90 | 1.20E-05 |
| Immunoregulatory interactions between Lymphoid & non-Lymphoid cells                   | 718 3133 3134 10666 3105 1525 3689 3106 999 3688 3135 7412 3107                                                                                    | 46  | 13 | 3.45  | 3.77 | 2.14E-05 |
| Cell-Cell communication                                                               | 1002 2318 3728 3655 50848 23705 88 1006 84612 3909 99 9 9459 1012 5584 36881001 4684 1000 51208 56288 6709                                         | 105 | 21 | 2.67  | 2.67 | 2.79E-05 |
| Integrin cell surface interactions                                                    | 8516 3655 50848 3689 5770 999 3679 3912 1280 3690 367 3 3688 7412 3680 3911                                                                        | 66  | 15 | 4.94  | 3.03 | 8.41E-05 |
| Interferon gamma signaling                                                            | 3133 3134 3105 3106 5770 2634 3135 2210 7412 3717 310 7 4684                                                                                       | 47  | 12 | 3.52  | 3.52 | 1.00E-04 |
| Interferon Signaling                                                                  | 4599 3133 3134 3437 3105 9636 3433 3106 5770 3690 263 4 3135 2210 3717 74123107 3434 4684                                                          | 95  | 18 | 7.12  | 2.53 | 2.00E-04 |
| Adherens junctions interactions                                                       | 1002 3728 23705 1006 999 1012 1001 1000                                                                                                            | 25  | 8  | 1.87  | 4.27 | 3.00E-04 |
| Axon guidance                                                                         | 10398 7223 375790 4651 10486 5604 7430 9723 10570 21 4 785 9037 4629 272895788 3983 286 100133941 998 783 3912 3690 3688 6478 23122 8829 4684 6709 | 200 | 28 | 14.98 | 1.87 | 1.00E-03 |
| Interferon alpha/beta signaling                                                       | 4599 3133 3134 3437 3105 9636 3433 3106 5770 3690 263 4 3135 3434 3107                                                                             | 74  | 14 | 5.54  | 2.53 | 1.00E-03 |
| Antigen Presentation: Folding, assembly & peptide loading of class I MHC              | 3133 3134 6890 3105 3106 3135 3107                                                                                                                 | 23  | 7  | 1.72  | 4.06 | 1.10E-03 |
| Tight junction interactions                                                           | 50848 84612 5584 51208 56288                                                                                                                       | 12  | 5  | 0.90  | 5.56 | 1.20E-03 |
| Pathway Commons Analysis: GTMMN+microRNA Versus Negative Control Downregulated Genes) |                                                                                                                                                    |     |    |       |      |          |
| Pathway Description                                                                   | Entrez Gene                                                                                                                                        | C   | O  | E     | R    | P-Value  |
| Activation of the pre-replicative complex                                             | 8318 4173 4175 55388 5558 5427 4174 990 1017 6119 5557                                                                                             | 29  | 11 | 2.26  | 4.88 | 5.57E-06 |
| Biosynthesis of the N-glycan precursor & transfer to a nascent protein                | 8818 79796 9945 29880 29929 6675 79868 5238 29926                                                                                                  | 21  | 9  | 1.63  | 5.51 | 1.25E-05 |
| Post-translational protein modification                                               | 5279 79796 9945 29929 5329 79001 29926 5281 4121 811 8818 22872 29880 2877 6675 9895 79868 2530 5238 3998 5277                                     | 99  | 21 | 7.70  | 2.73 | 1.91E-05 |
| G2/M Checkpoints                                                                      | 5984 4175 55388 990 5982 6119 8318 4173 5985 4174 472 1017                                                                                         | 40  | 12 | 3.11  | 3.86 | 3.31E-05 |
| Activation of ATR in response to replication stress                                   | 5984 4175 55388 990 5982 6119 8318 4173 5985 4174 1017                                                                                             | 34  | 11 | 2.64  | 4.16 | 3.21E-05 |
| DNA strand elongation                                                                 | 5984 4175 5558 5982 6119 5557 8318 4173 5985 4174                                                                                                  | 30  | 10 | 2.33  | 4.29 | 5.50E-05 |
| Pyrimidine metabolism                                                                 | 7371 7084 1890 1633 7372 1806 4907                                                                                                                 | 18  | 7  | 1.40  | 5.00 | 0.0002   |
| Asparagine N-linked glycosylation                                                     | 79796 9945 29929 29926 4121 811 8818 22872 29880 6675 9895 79868 2530 5238 3998                                                                    | 67  | 15 | 5.21  | 2.88 | 0.0002   |
| Synthesis of substrates in N-glycan biosynthesis                                      | 9945 29926 8818 29880 6675 5238                                                                                                                    | 14  | 6  | 1.09  | 5.51 | 0.0004   |
| G2/M DNA damage checkpoint                                                            | 4175 55388 990 8318 4173 4174 472 1017                                                                                                             | 27  | 8  | 2.10  | 3.81 | 0.0008   |

**Supplementary Figure 4. Microarray gene expression analysis.**

**A**

| Gene Symbol | Entrez Gene | P-Value | Fold Change |
|-------------|-------------|---------|-------------|
| TPM1        | 7168        | 1.7E-04 | 9.85        |
| CDC42       | 998         | 9.3E-04 | 9.52        |
| CELA2A      | 51032       | 4.9E-04 | 7.40        |
| TPM2        | 7169        | 3.5E-05 | 6.93        |
| NPY         | 4852        | 7.5E-02 | 6.61        |
| ITGB1       | 3688        | 8.9E-04 | 6.20        |
| TSPAN8      | 7103        | 1.2E-02 | 5.68        |
| GKN1        | 56287       | 1.6E-02 | 5.46        |
| PDLIM7      | 9260        | 1.3E-05 | 5.30        |
| THBD        | 7056        | 2.7E-03 | 5.03        |
| TNNI3       | 7137        | 1.6E-02 | 4.83        |
| TNNC1       | 7134        | 5.5E-03 | 4.82        |
| KCNB1       | 3745        | 3.9E-04 | 4.64        |
| MYH6        | 4624        | 1.5E-01 | 4.31        |
| PKP4        | 8502        | 7.6E-04 | 4.29        |
| ACTN2       | 88          | 2.8E-04 | 4.17        |
| MICAL2      | 9645        | 7.2E-04 | 4.17        |
| CD36        | 948         | 1.5E-02 | 4.04        |
| GPX3        | 2878        | 3.7E-04 | 3.95        |
| RRAD        | 6236        | 2.9E-02 | 3.94        |
| CRYM        | 1428        | 4.5E-03 | 3.93        |
| TIN         | 7273        | 3.3E-02 | 3.92        |
| PGAM2       | 5224        | 1.5E-03 | 3.72        |
| COL2A1      | 1280        | 4.3E-02 | 3.66        |
| ACE2        | 59272       | 1.8E-03 | 3.62        |
| HIST1H2BG   | 8339        | 9.6E-04 | 3.46        |
| MYH6        | 4624        | 1.1E-01 | 3.46        |
| HCP5        | 10866       | 6.8E-03 | 3.46        |
| MNDA        | 4332        | 4.4E-02 | 3.40        |
| MYH3        | 4621        | 6.6E-02 | 3.33        |
| HIST1H2BC   | 8339        | 4.4E-03 | 3.27        |
| EPB41L1     | 2036        | 2.6E-03 | 3.21        |
| LINC00472   | 79940       | 1.3E-03 | 3.15        |
| HIST2H2BE   | 8349        | 3.8E-04 | 3.15        |
| CDH8        | 1006        | 2.2E-04 | 3.04        |
| PLLP        | 51090       | 3.3E-03 | 3.02        |
| NCAM1       | 4684        | 6.1E-04 | 3.00        |
| GABBR1      | 2550        | 1.6E-05 | 2.95        |
| SYNPO2L     | 79933       | 6.0E-02 | 2.89        |
| SIGLEC15    | 284266      | 6.9E-06 | 2.87        |
| ART4        | 420         | 2.7E-03 | 2.85        |
| MYOZ2       | 51778       | 3.5E-03 | 2.85        |
| CDH1        | 999         | 1.2E-03 | 2.83        |
| OLR1        | 4973        | 3.2E-03 | 2.79        |
| PPL         | 5493        | 8.3E-04 | 2.77        |
| CASQ2       | 845         | 2.4E-01 | 2.69        |
| GNAS        | 2778        | 4.0E-03 | 2.68        |
| JMJD6       | 23210       | 1.6E-03 | 2.63        |
| CELA2B      | 51032       | 1.7E-03 | 2.63        |
| TNN2        | 7139        | 3.2E-02 | 2.61        |
| RCAN2       | 10231       | 5.0E-04 | 2.60        |
| CLUL1       | 27098       | 5.2E-03 | 2.59        |
| CYP17A1     | 1586        | 3.5E-02 | 2.59        |
| CHI3L1      | 1116        | 1.2E-02 | 2.56        |
| RNF41       | 10193       | 6.3E-04 | 2.55        |
| IL18        | 3606        | 5.3E-03 | 2.53        |
| RAB40B      | 10966       | 2.7E-03 | 2.50        |
| HSD3B1      | 3283        | 1.0E-01 | 2.49        |
| ALDH1A3     | 220         | 2.3E-02 | 2.49        |
| RCAN1       | 1827        | 4.3E-02 | 2.47        |
| OPN3        | 23596       | 2.7E-02 | 2.46        |
| PALMD       | 54873       | 7.3E-03 | 2.46        |
| CD24        | 1E+08       | 1.6E-01 | 2.41        |
| KCNK3       | 3777        | 5.4E-02 | 2.37        |
| SEPT6       | 23157       | 2.6E-03 | 2.32        |
| ST6GALNAC5  | 81849       | 1.5E-01 | 2.31        |
| GPR64       | 10149       | 5.6E-02 | 2.30        |
| NRP1        | 8829        | 6.3E-04 | 2.29        |
| C1orf95     | 375057      | 1.0E-02 | 2.29        |
| BMP4        | 652         | 2.9E-03 | 2.28        |
| CALD1       | 800         | 1.8E-03 | 2.26        |
| HIST1H4H    | 8365        | 1.2E-02 | 2.25        |
| AQP1        | 358         | 3.0E-01 | 2.25        |
| HIST1H2AD   | 3013        | 3.5E-03 | 2.23        |
| SGS1        | 83445       | 1.6E-01 | 2.21        |
| ITGB2       | 3689        | 5.9E-02 | 2.18        |
| DTNA        | 1837        | 2.0E-02 | 2.17        |
| FCGR1B      | 2210        | 5.1E-02 | 2.17        |
| GYPB        | 2993        | 1.6E-03 | 2.15        |
| BAMBI       | 25805       | 1.1E-01 | 2.15        |
| MPZL1       | 9019        | 2.5E-03 | 2.14        |
| ANKRD1      | 27063       | 9.9E-03 | 2.13        |
| OPCML       | 4978        | 1.4E-02 | 2.13        |
| PLAC8       | 51316       | 1.2E-02 | 2.11        |
| DES         | 1674        | 5.6E-02 | 2.10        |
| NECB2       | 54550       | 8.2E-03 | 2.08        |
| RGS5        | 8490        | 6.5E-02 | 2.07        |
| HTR2B       | 3357        | 6.5E-02 | 2.07        |
| CLDN18      | 51208       | 1.6E-03 | 2.07        |
| CLSTN2      | 64084       | 4.6E-02 | 2.06        |
| HIST2H2AA3  | 8337        | 1.6E-03 | 2.06        |
| PDLIM5      | 10611       | 7.8E-02 | 2.03        |
| EGLN3       | 112399      | 1.5E-03 | 2.03        |
| ARL4C       | 10123       | 7.1E-04 | 2.02        |
| LDB3        | 11155       | 7.7E-05 | 2.01        |
| SLC24A3     | 57419       | 2.0E-03 | 2.01        |
| MEPE        | 56955       | 4.2E-03 | 2.00        |

**B**

| Gene Symbol | Entrez Gene | P-Value | Fold Change |
|-------------|-------------|---------|-------------|
| MFSD9       | 84804       | 3.5E-03 | -2.00       |
| TNMD        | 64102       | 2.3E-02 | -2.00       |
| B3GALNT1    | 8706        | 9.4E-02 | -2.00       |
| HAS2        | 3037        | 1.7E-01 | -2.03       |
| RAB8B       | 51762       | 3.5E-02 | -2.04       |
| LY96        | 23643       | 4.6E-03 | -2.04       |
| PTX3        | 5806        | 1.1E-01 | -2.04       |
| FBN2        | 2201        | 2.4E-03 | -2.04       |
| HAPLN1      | 1404        | 8.0E-02 | -2.06       |
| NTRK2       | 4915        | 2.0E-01 | -2.07       |
| MAN1A1      | 4121        | 2.1E-02 | -2.07       |
| PIP5K1B     | 8395        | 1.4E-01 | -2.08       |
| RABGAP1L    | 9910        | 1.1E-02 | -2.09       |
| SOCS2       | 8835        | 6.5E-02 | -2.09       |
| MFAP3L      | 9848        | 1.1E-02 | -2.10       |
| CPNE3       | 8895        | 7.0E-03 | -2.11       |
| LRRFIP1     | 9208        | 3.8E-03 | -2.13       |
| DZIP1       | 22873       | 1.2E-03 | -2.14       |
| TMEFF1      | 8577        | 2.0E-02 | -2.14       |
| PNP         | 4860        | 2.3E-03 | -2.14       |
| MMP3        | 4314        | 2.5E-01 | -2.15       |
| NEFM        | 4741        | 2.3E-01 | -2.16       |
| FGF7        | 2252        | 5.1E-03 | -2.16       |
| RNASE1      | 6035        | 1.7E-01 | -2.16       |
| LY75        | 4065        | 3.9E-03 | -2.17       |
| ATF3        | 467         | 4.8E-02 | -2.18       |
| TM4SF1      | 4071        | 8.6E-03 | -2.20       |
| CREBL2      | 1389        | 1.9E-03 | -2.20       |
| PTPRN2      | 5799        | 3.2E-03 | -2.21       |
| GK          | 2710        | 2.7E-02 | -2.22       |
| SGPP1       | 81537       | 4.4E-03 | -2.24       |
| SSX4        | 6759        | 1.3E-01 | -2.26       |
| VWASA       | 4013        | 4.3E-03 | -2.26       |
| DPYD        | 1806        | 2.1E-04 | -2.27       |
| PLXNC1      | 10154       | 2.1E-02 | -2.28       |
| SSX1        | 6756        | 1.0E-01 | -2.29       |
| STOM        | 2040        | 3.1E-03 | -2.29       |
| KRT19       | 3880        | 2.7E-01 | -2.29       |
| DPP4        | 1803        | 1.1E-02 | -2.30       |
| CETN3       | 1070        | 4.6E-04 | -2.33       |
| CPD         | 1362        | 7.3E-05 | -2.36       |
| ARL6IP1     | 23204       | 1.5E-04 | -2.37       |
| GPR183      | 1880        | 7.7E-02 | -2.38       |
| ID4         | 3400        | 1.7E-01 | -2.40       |
| SV2A        | 9900        | 3.9E-04 | -2.40       |
| OGN         | 4969        | 2.6E-01 | -2.43       |
| FAM184A     | 79632       | 3.7E-03 | -2.44       |
| DIRAS2      | 54769       | 3.9E-01 | -2.46       |
| B3GNT2      | 10678       | 6.4E-03 | -2.52       |
| HLA-DPA1    | 3113        | 4.8E-03 | -2.57       |
| CTNND1      | 1500        | 2.2E-04 | -2.59       |
| CSPG5       | 10675       | 2.3E-02 | -2.61       |
| ATP8B4      | 79895       | 2.7E-04 | -2.62       |
| CTSK        | 1513        | 6.2E-02 | -2.69       |
| SPAG1       | 6674        | 1.2E-03 | -2.69       |
| ERP44       | 23071       | 6.2E-03 | -2.82       |
| TM4SF4      | 7104        | 2.7E-02 | -3.64       |
| SCRG1       | 11341       | 4.5E-02 | -3.93       |
| GCH1        | 2643        | 4.4E-03 | -3.99       |

**C**

| Pathway Analysis: GTMMN microRNA Versus GTMMN  |                                                |     |    |     |       |         |
|------------------------------------------------|------------------------------------------------|-----|----|-----|-------|---------|
| Upregulated Genes                              |                                                |     |    |     |       |         |
| Pathway Name                                   | Entrez Gene                                    | C   | O  | E   | R     | P       |
| Striated Muscle Contraction                    | 7134 7137 7169 1674 4621 7139 88 4624 7168     | 30  | 9  | 0.2 | 42.14 | 4.0E-13 |
| Muscle contraction                             | 7134 7137 7169 1674 800 4621 7139 4624 88 7168 | 45  | 10 | 0.3 | 31.21 | 5.2E-13 |
| Cell-Cell communication                        | 999 3688 88 4684 51208 1006                    | 105 | 6  | 0.8 | 8.03  | 1.0E-04 |
| Smooth Muscle Contraction                      | 7169 800 7168                                  | 19  | 3  | 0.1 | 22.18 | 3.0E-04 |
| Cell junction organization                     | 999 3688 51208 1006                            | 60  | 4  | 0.4 | 9.36  | 9.0E-04 |
| Integrin cell surface interactions             | 3689 999 1280 3688                             | 66  | 4  | 0.5 | 8.51  | 1.2E-03 |
| Cell surface interactions at the vascular wall | 3689 4973 3688 7056                            | 70  | 4  | 0.5 | 8.03  | 1.5E-03 |
| Pathway Analysis: GTMMN microRNA Versus GTMMN  |                                                |     |    |     |       |         |
| Downregulated Genes                            |                                                |     |    |     |       |         |
| Pathway Name                                   | Entrez Gene                                    | C   | O  | E   | R     | P       |
| Metabolism of nucleotides                      | 1806 4860                                      | 50  | 2  | 0.2 | 9.03  | 2.1E-02 |

**Supplementary Figure 5. Microarray gene expression analysis.**

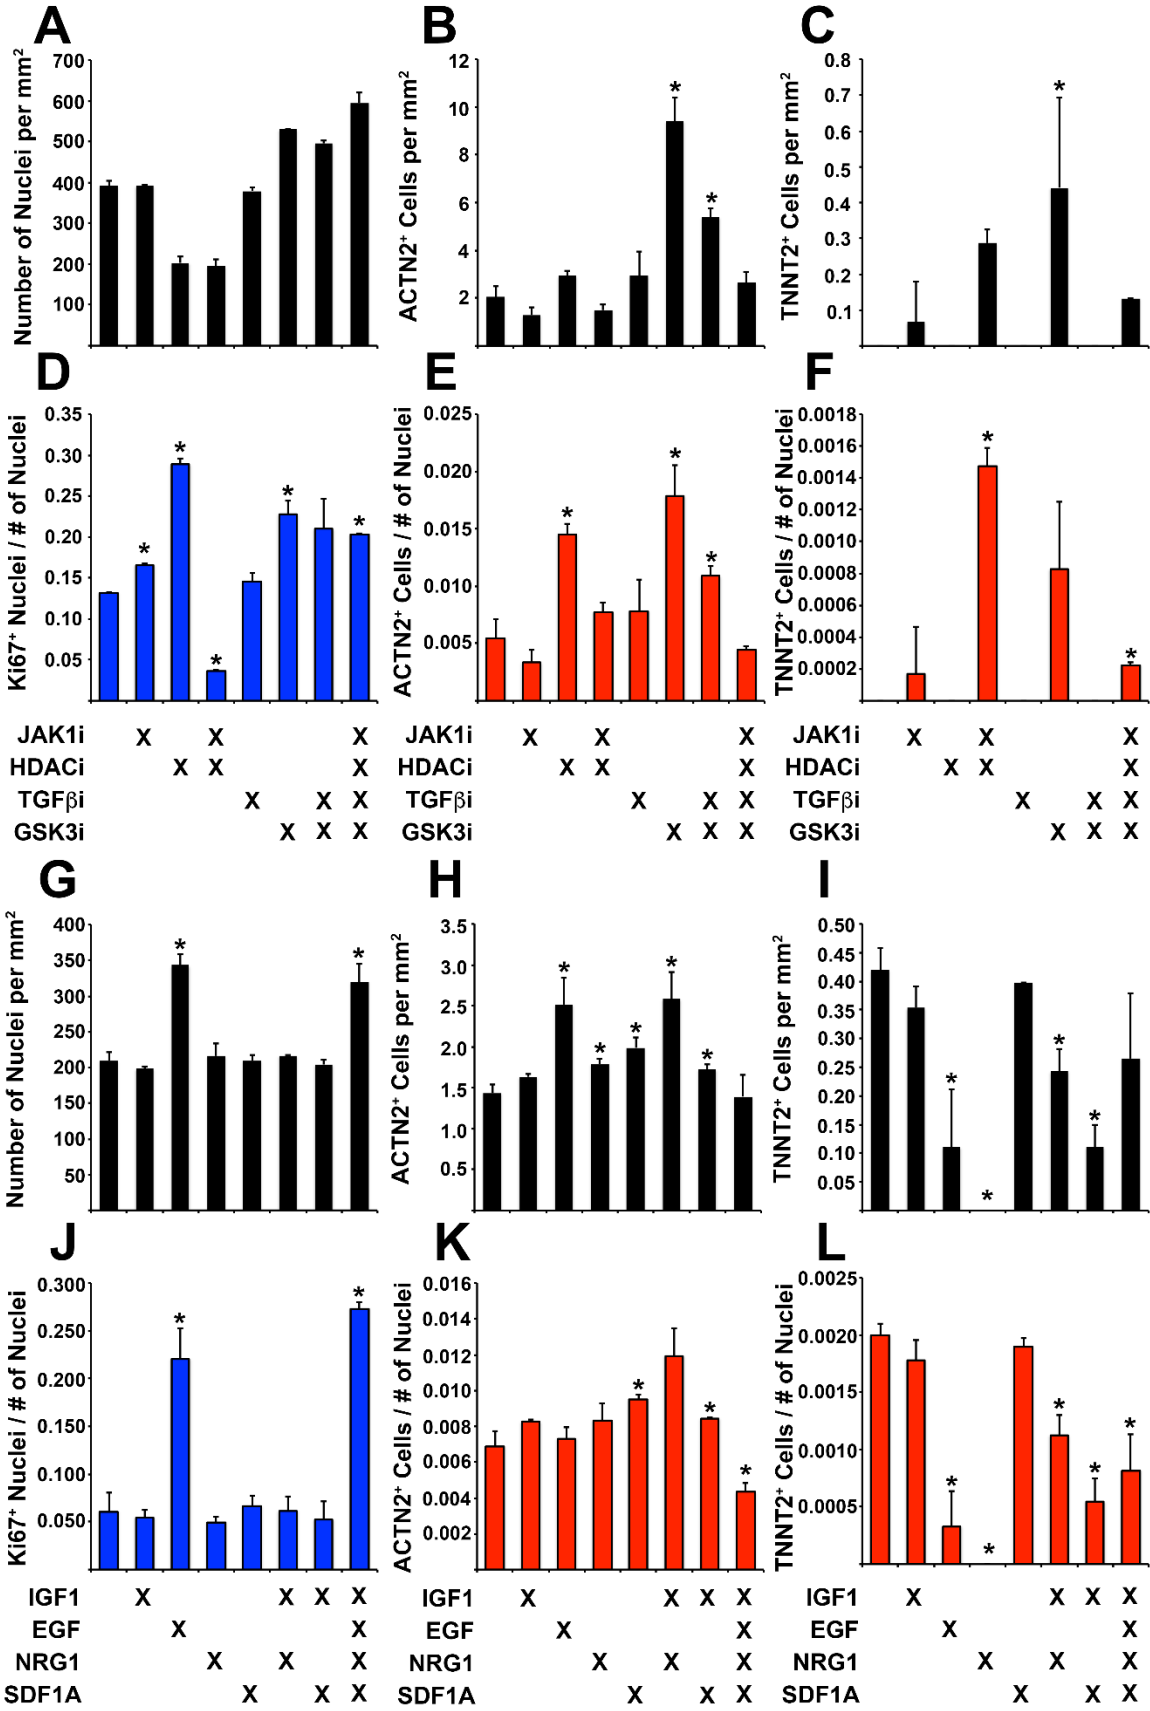

**Supplementary Figure 6. Effect of small molecule inhibitors or protein ligands on the transdifferentiation efficiency of HDF transduced with 5 cardiac TF only.**

| <b>Gene Symbol</b> | <b>Accession Number</b> | <b>Sequence</b>             | <b>Amplimer Size</b> |
|--------------------|-------------------------|-----------------------------|----------------------|
| <b>TNNT2</b>       | NM_000364.2             | GGCAGCTGCTGTTCTGAGGGAG      | 191 bps              |
|                    |                         | TGCCCTGGTCTCCTCGGTCT        |                      |
| <b>MYH6</b>        | NM_002471.2             | AGAGGCCCAACGCTCCCTCA        | 193 bps              |
|                    |                         | GGCGTTCTTCGCCTTGCCCT        |                      |
| <b>MYH7</b>        | NM_000257.2             | CCGAGGAGGCGGAGGAGCAA        | 217 bps              |
|                    |                         | GCATGGGGCTTTGCTGGCAC        |                      |
| <b>MYL2</b>        | NM_000432.3             | TTGCTGCCCTTGGGCGAGTG        | 273 bps              |
|                    |                         | GGGGGAAGGCGGCGAACATC        |                      |
| <b>MYL7</b>        | NM_021223.2             | AGCCACCAAGCAGGCCCAAC        | 172 bps              |
|                    |                         | TGGGACACTCACCTTCCCCAGC      |                      |
| <b>CASQ2</b>       | NM_001232               | TCGCCTGCGCCCAGAAGAAAT       | 205 bps              |
|                    |                         | CCAGTAGGCAACGAGCAGAGGAA     |                      |
| <b>NPPA</b>        | NM_006172.3             | GGGCCCTGGGACTCCTCTG         | 115 bps              |
|                    |                         | CCTGTCCATCCTGCCCCCGA        |                      |
| <b>ATP2A2</b>      | NM_001681.3             | ACCTGGAACCTGCAATACTGGAGTAAC | 128 bps              |
|                    |                         | CCCCAACATCAGTCATGCACAGGG    |                      |
| <b>SLC8A1</b>      | NM_001112800            | AGTGCCAGACACATTTGCCAGC      | 129 bps              |
|                    |                         | GCGATGGACCAGGCCACACC        |                      |
| <b>RYR2</b>        | NM_001035.2             | AGAGCCGAAGTGTGCAGCGG        | 213 bps              |
|                    |                         | CCGCTGGGCCTTGAAGCCAT        |                      |
| <b>PLN</b>         | NM_002667               | AACTCCCCAGCTAAACACCCGT      | 167 bps              |
|                    |                         | ACCAGCAGGACAGGAAGTCTGAA     |                      |
| <b>MYH11</b>       | NM_002474               | AGTATCACGGGAGAGCTGGA        | 217 bps              |
|                    |                         | ATGTCCTCTCGTCTCTGGCT        |                      |
| <b>ACTA2</b>       | NM_001613               | GCCAAGCACTGTCAGGAATC        | 213 bps              |
|                    |                         | GTCACCCACGTAGCTGTCTT        |                      |
| <b>COL1A1</b>      | NM_000088               | AAGGCCAAGTCGAGGGCCAAGA      | 246 bps              |
|                    |                         | TTTCTTGGTTCGGTGGGTGACTCTGA  |                      |



|               |           |                        |         |
|---------------|-----------|------------------------|---------|
| <b>COL1A2</b> | NM_000089 | AGGGCCAGGGAAACTTTTGCCG | 300 bps |
|               |           | TCCGGCTGGGCCCTTTCTTACA |         |
| <b>GATA4</b>  | NM_002052 | TCATCTCACTACGGGCACAG   | 233 bps |
|               |           | GGGAAGAGGGGAAGATTACGC  |         |
| <b>TBX5</b>   | NM_181486 | AAAGAATATCCCGTGGTCCC   | 291 bps |
|               |           | TTCACTGGGTGATGTCTCCA   |         |
| <b>MEF2C</b>  | NM_002397 | ACACCGCCAGCGCTCTTCAC   | 237 bps |
|               |           | CCTCGTGGCGCGTGTGTTGT   |         |
| <b>MYOCD</b>  | NM_153604 | CAAGCCAAAGGTGAAGAAGC   | 177 bps |
|               |           | TAGCTGAATCGGTGTTGCTG   |         |
| <b>NKX2-5</b> | NM_004387 | CCTCAACAGCTCCCTGACTC   | 201 bps |
|               |           | GGGACAGCTAAGACACCAG    |         |
| <b>ACTB</b>   | NM_001101 | ACAGAGCCTCGCCTTTGCCGAT | 196 bps |
|               |           | CATGCCACCATCACGCCCTG   |         |

**Supplementary Table 2.** Primers used for gene expression analysis.
